# Supplementary material
Source: PubMed Central journal article supplement (PMC9799130)
Supplement: NIHMS1837233-supplement-supinfo.pdf [file NIHMS1837233-supplement-supinfo.pdf]

**Supplemental Table 1**

*Descriptive Statistics and Zero-Order Correlations for Time 1 (1) and Time 2 (2) Sense of Purpose (SP), Relationship Satisfaction (RS), Investment Size (IS), Commitment (Com), Intimacy (Int), Trust (Trust), and Perceived Quality of Alternatives (PQA).*

|             | 1.                 | 2.                   | 3.                   | 4.                   | 5.                   | 6.                   | 7.                   | 8.                | 9.                  | 10.                  | 11.                  | 12.                  | 13.                  | 14.       |
|-------------|--------------------|----------------------|----------------------|----------------------|----------------------|----------------------|----------------------|-------------------|---------------------|----------------------|----------------------|----------------------|----------------------|-----------|
| 1. SP 1     | -                  |                      |                      |                      |                      |                      |                      |                   |                     |                      |                      |                      |                      |           |
| 2. RS 1     | .45<br>[.38, .51]  | -                    |                      |                      |                      |                      |                      |                   |                     |                      |                      |                      |                      |           |
| 3. IS 1     | .28<br>[.21, .34]  | .56<br>[.49, .62]    | -                    |                      |                      |                      |                      |                   |                     |                      |                      |                      |                      |           |
| 4. Com 1    | .27<br>[.20, .34]  | .61<br>[.56, .66]    | .55<br>[.49, .61]    | -                    |                      |                      |                      |                   |                     |                      |                      |                      |                      |           |
| 5. Int 1    | .40<br>[.34, .47]  | .87<br>[.85, .89]    | .54<br>[.48, .61]    | .62<br>[.57, .67]    | -                    |                      |                      |                   |                     |                      |                      |                      |                      |           |
| 6. Trust 1  | .35<br>[.29, .42]  | .68<br>[.63, .71]    | .47<br>[.40, .54]    | .60<br>[.55, .65]    | .70<br>[.66, .75]    | -                    |                      |                   |                     |                      |                      |                      |                      |           |
| 7. PQA 1    | .01<br>[-.05, .07] | -.09<br>[-.15, -.03] | -.12<br>[-.19, -.06] | -.32<br>[-.38, -.27] | -.12<br>[-.18, -.06] | -.12<br>[-.18, -.07] | -                    |                   |                     |                      |                      |                      |                      |           |
| 8. SP 2     | .77<br>[.74, .80]  | .45<br>[.39, .51]    | .27<br>[.21, .34]    | .26<br>[.18, .33]    | .42<br>[.36, .48]    | .35<br>[.28, .43]    | .00<br>[-.07, .06]   | -                 |                     |                      |                      |                      |                      |           |
| 9. RS 2     | .43<br>[.36, .49]  | .86<br>[.83, .84]    | .48<br>[.41, .54]    | .54<br>[.49, .59]    | .79<br>[.76, .82]    | .62<br>[.55, .67]    | -.09<br>[-.15, -.03] | .50<br>[.44, .56] | -                   |                      |                      |                      |                      |           |
| 10. IS 2    | .26<br>[.21, .33]  | .48<br>[.42, .54]    | .60<br>[.55, .65]    | .47<br>[.41, .52]    | .47<br>[.41, .53]    | .43<br>[.36, .50]    | -.18<br>[-.24, -.11] | .34<br>[.28, .40] | .55<br>[.50, .61]   | -                    |                      |                      |                      |           |
| 11. Com 2   | .24<br>[.17, .30]  | .55<br>[.49, .61]    | .47<br>[.40, .53]    | .70<br>[.66, .74]    | .57<br>[.50, .63]    | .52<br>[.45, .59]    | -.27<br>[-.32, -.23] | .31<br>[.25, .38] | .62<br>[.57, .67]   | .59<br>[.54, .64]    | -                    |                      |                      |           |
| 12. Int 2   | .37<br>[.30, .44]  | .78<br>[.74, .81]    | .48<br>[.42, .55]    | .55<br>[.50, .60]    | .83<br>[.79, .86]    | .58<br>[.52, .64]    | -.12<br>[-.17, -.06] | .45<br>[.39, .51] | .86<br>[.85, .88]   | .55<br>[.50, .61]    | .63<br>[.58, .68]    | -                    |                      |           |
| 13. Trust 2 | .32<br>[.26, .38]  | .60<br>[.55, .65]    | .42<br>[.35, .55]    | .53<br>[.48, .58]    | .59<br>[.53, .64]    | .75<br>[.71, .79]    | -.15<br>[-.20, -.10] | .39<br>[.32, .46] | .69<br>[.65, .74]   | .51<br>[.45, .58]    | .63<br>[.58, .68]    | .70<br>[.66, .75]    | -                    |           |
| 14. PQA 2   | .05<br>[-.01, .11] | -.06<br>[-.12, .00]  | -.11<br>[-.18, -.05] | -.25<br>[-.30, -.19] | -.10<br>[-.16, -.05] | -.13<br>[-.19, -.07] | .55<br>[.49, .60]    | .06<br>[.01, .11] | -.06<br>[-.11, .00] | -.10<br>[-.17, -.04] | -.30<br>[-.35, -.24] | -.08<br>[-.13, -.02] | -.11<br>[-.17, -.05] | -         |
| Range       | 1.00-5.00          | 1.00-9.00            | 1.00-9.00            | 1.00-9.00            | 1.00-7.00            | 1.00-7.00            | 1.00-9.00            | 1.00-5.00         | 1.00-9.00           | 1.00-9.00            | 1.00-9.00            | 1.00-7.00            | 1.00-7.00            | 1.00-9.00 |
| <i>M</i>    | 4.05               | 7.00                 | 6.96                 | 7.84                 | 5.83                 | 6.26                 | 4.22                 | 4.09              | 7.00                | 7.02                 | 7.90                 | 5.80                 | 6.23                 | 4.15      |
| <i>SD</i>   | 0.78               | 2.14                 | 1.73                 | 1.45                 | 1.43                 | 1.06                 | 2.23                 | 0.77              | 2.11                | 1.75                 | 1.41                 | 1.44                 | 1.08                 | 2.24      |

*Note.* Sense of purpose associations are based on entire two wave sample ( $N = 1200$ ) while associations involving relationship quality variables from Time 1 are based on people in relationships at Time 1 ( $N = 912$ ), and associations involving Time 2 relationship quality variables are based on committed continuers ( $N = 874$ ).

**Supplemental Table 2**

*Factor Loadings, Intercepts, Variances, and Covariances for the Six Sense of Purpose Items and the Five Relationship Quality Manifest Variables: Relationship Satisfaction, Investment Size, Commitment, Intimacy, and Trust with Controlling for Gender, Age, and Relationship Duration at Time 1 and Time 2.*

|                                               | <b>Estimate</b> | <b>Lower<br/>95% CI</b> | <b>Upper<br/>95% CI</b> | <b>Std. Est.</b> |
|-----------------------------------------------|-----------------|-------------------------|-------------------------|------------------|
| <b>Predicting Time 2 Relationship Quality</b> |                 |                         |                         |                  |
| Time 1 Sense of Purpose                       | 0.07            | -0.05                   | 0.18                    | 0.03             |
| Time 1 Relationship Quality                   | 0.88            | 0.83                    | 0.92                    | 0.87             |
| Gender (0 = Men)                              | 0.09            | -0.02                   | 0.19                    | 0.05             |
| Centered Age                                  | 0.00            | 0.00                    | 0.01                    | 0.00             |
| Centered Relationship Duration                | 0.00            | -0.01                   | 0.01                    | 0.00             |
| <b>Predicting Time 2 Sense of Purpose</b>     |                 |                         |                         |                  |
| Time 1 Sense of Purpose                       | 0.79            | 0.73                    | 0.85                    | 0.77             |
| Time 1 Relationship Quality                   | 0.05            | 0.02                    | 0.07                    | 0.12             |
| Gender (0 = Men)                              | 0.09            | 0.03                    | 0.15                    | 0.12             |
| Centered Age                                  | 0.00            | 0.00                    | 0.01                    | 0.00             |
| Centered Relationship Duration                | 0.00            | -0.01                   | 0.00                    | 0.00             |
| <b>Correlated Change</b>                      |                 |                         |                         |                  |
| Relationship Quality ~ Purpose                | 0.12            | 0.09                    | 0.16                    | 0.36             |
| <b>Factor Loadings</b>                        |                 |                         |                         |                  |
| Item 1                                        | 1.00            | 1.00                    | 1.00                    | 0.71             |
| Item 2                                        | 0.79            | 0.72                    | 0.86                    | 0.56             |
| Item 3                                        | 1.08            | 1.00                    | 1.16                    | 0.77             |
| Item 4                                        | 0.75            | 0.69                    | 0.81                    | 0.53             |
| Item 5                                        | 0.90            | 0.83                    | 0.96                    | 0.64             |
| Item 6                                        | 0.74            | 0.68                    | 0.80                    | 0.53             |
| Satisfaction                                  | 1.00            | 1.00                    | 1.00                    | 1.8              |
| Investment                                    | 0.53            | 0.49                    | 0.57                    | 0.95             |
| Commitment                                    | 0.53            | 0.5                     | 0.57                    | 0.96             |
| Intimacy                                      | 0.72            | 0.7                     | 0.75                    | 1.3              |
| Trust                                         | 0.51            | 0.48                    | 0.54                    | 0.92             |
| <b>Intercepts</b>                             |                 |                         |                         |                  |
| Item 1                                        | 4.01            | 3.95                    | 4.08                    | 4.01             |
| Item 2                                        | 3.9             | 3.85                    | 3.95                    | 3.9              |
| Item 3                                        | 3.94            | 3.88                    | 4.00                    | 3.94             |
| Item 4                                        | 4.06            | 4.01                    | 4.11                    | 4.06             |
| Item 5                                        | 4.25            | 4.2                     | 4.3                     | 4.25             |
| Item 6                                        | 4.46            | 4.41                    | 4.51                    | 4.46             |
| Satisfaction                                  | 6.99            | 6.86                    | 7.11                    | 6.99             |
| Investment                                    | 7.00            | 6.91                    | 7.10                    | 7.00             |
| Commitment                                    | 7.88            | 7.80                    | 7.97                    | 7.88             |
| Intimacy                                      | 5.79            | 5.70                    | 5.88                    | 5.79             |
| Trust                                         | 6.24            | 6.16                    | 6.32                    | 6.24             |
| <b>Variances</b>                              |                 |                         |                         |                  |
| Item 1                                        | 0.57            | 0.52                    | 0.61                    | 0.57             |

|                    |      |      |      |      |
|--------------------|------|------|------|------|
| Item 2             | 0.45 | 0.42 | 0.49 | 0.45 |
| Item 3             | 0.39 | 0.35 | 0.42 | 0.39 |
| Item 4             | 0.31 | 0.28 | 0.33 | 0.31 |
| Item 5             | 0.3  | 0.27 | 0.32 | 0.3  |
| Item 6             | 0.32 | 0.3  | 0.35 | 0.32 |
| Satisfaction       | 0.58 | 0.51 | 0.66 | 0.58 |
| Investment         | 1.49 | 1.38 | 1.61 | 1.49 |
| Commitment         | 0.96 | 0.89 | 1.04 | 0.96 |
| Intimacy           | 0.26 | 0.23 | 0.3  | 0.26 |
| Trust              | 0.57 | 0.52 | 0.62 | 0.57 |
| <hr/>              |      |      |      |      |
| <b>Covariances</b> |      |      |      |      |
| Item 1             | 0.12 | 0.07 | 0.16 | 0.12 |
| Item 2             | 0.13 | 0.1  | 0.17 | 0.13 |
| Item 3             | 0.08 | 0.05 | 0.11 | 0.08 |
| Item 4             | 0.09 | 0.07 | 0.12 | 0.09 |
| Item 5             | 0.06 | 0.03 | 0.08 | 0.06 |
| Item 6             | 0.14 | 0.11 | 0.16 | 0.14 |
| Satisfaction       | 0.31 | 0.24 | 0.39 | 0.31 |
| Investment         | 0.68 | 0.56 | 0.79 | 0.68 |
| Commitment         | 0.52 | 0.44 | 0.59 | 0.52 |
| Intimacy           | 0.12 | 0.09 | 0.15 | 0.12 |
| Trust              | 0.37 | 0.32 | 0.42 | 0.37 |

---
